# Supplementary material for: The association of gluten-free diet with thyroid autoimmunity in patients with celiac disease: a meta-analysis
Source: Royal Society of Chemistry journal article supplement (doi:10.1039/d3fo01573d), 2024-01-01
Supplement: d3fo01573d1.pdf [file d3fo01573d1.pdf]

Table S1: The risk of bias within individual studies for observational studies by the NOS.

**Sategna-Guidetti et al.1998**

|                                                                                                    |                                                                                                                                                                                                          |
|----------------------------------------------------------------------------------------------------|----------------------------------------------------------------------------------------------------------------------------------------------------------------------------------------------------------|
| Study type                                                                                         | Cross-sectional study                                                                                                                                                                                    |
| Participants                                                                                       | Patients: adult<br><br>N: 132 cases, 53 controls<br><br>Gender: 43 males/ 89 females case, 12 males/ 41females control<br><br>Location: Italy                                                            |
| Comparison                                                                                         | Comparison: GFD in Patients with CD vs. control<br><br>Case: GFD in Patients with CD<br><br>Control: Non- GFD in Patients with CD                                                                        |
| Outcomes                                                                                           | Main study outcome: the risk of prevalence of autoimmune thyroid disease and thyroid dysfunction<br><br>Available outcomes: the risk of prevalence of autoimmune thyroid disease and thyroid dysfunction |
| <i>Risk of bias</i>                                                                                |                                                                                                                                                                                                          |
| <b>Bias</b>                                                                                        | <b>Authors' judgment</b><br><b>Support for judgment</b>                                                                                                                                                  |
| Is the case definition adequate ( <b>Selection</b> )                                               | 1<br>yes, with independent validation                                                                                                                                                                    |
| Representativeness of the cases( <b>Selection</b> )                                                | 1<br>consecutive or obviously representative series of cases                                                                                                                                             |
| Selection of Controls( <b>Selection</b> )                                                          | 0<br>hospital controls                                                                                                                                                                                   |
| Definition of Controls( <b>Selection</b> )                                                         | 1<br>no history of disease (endpoint)                                                                                                                                                                    |
| Comparability of cases and controls on the basis of the design or analysis( <b>Comparability</b> ) | 2<br>study controls age and gender between case and control                                                                                                                                              |
| Ascertainment of exposure( <b>Exposure</b> )                                                       | 0<br>not described                                                                                                                                                                                       |
| Same method of ascertainment for cases and controls( <b>Exposure</b> )                             | 1<br>yes                                                                                                                                                                                                 |
| Non-Response rate( <b>Exposure</b> )                                                               | 0<br>not described                                                                                                                                                                                       |

**Toscano et.al.2000**

|              |                                                                                                                                                                               |
|--------------|-------------------------------------------------------------------------------------------------------------------------------------------------------------------------------|
| Study type   | Cross-sectional study                                                                                                                                                         |
| Participants | <p>Patients: adolescent</p> <p>N: 25 cases, 19 controls</p> <p>Gender: 16 males, 28 females</p> <p>Location: Italy</p>                                                        |
| Comparison   | <p>Comparison: GFD in Patients with CD vs. control</p> <p>Case: GFD in Patients with CD</p> <p>Control: Non- GFD in Patients with CD</p>                                      |
| Outcomes     | <p>Main study outcome: the risk of ATPO and ATG positivity and thyroid dysfunction</p> <p>Available outcomes: the risk of ATPO and ATG positivity and thyroid dysfunction</p> |

***Risk of bias***

| Bias                                                                                               | Authors' judgment | Support for judgment                                    |
|----------------------------------------------------------------------------------------------------|-------------------|---------------------------------------------------------|
| Is the case definition adequate( <b>Selection</b> )                                                | 1                 | yes, with independent validation                        |
| Representativeness of the cases( <b>Selection</b> )                                                | 1                 | consecutive or obviously representative series of cases |
| Selection of Controls( <b>Selection</b> )                                                          | 0                 | not described                                           |
| Definition of Controls( <b>Selection</b> )                                                         | 1                 | no history of disease (endpoint)                        |
| Comparability of cases and controls on the basis of the design or analysis( <b>Comparability</b> ) | 1                 | study only controls age between case and control        |
| Ascertainment of exposure( <b>Exposure</b> )                                                       | 1                 | secure record                                           |
| Same method of ascertainment for cases and controls( <b>Exposure</b> )                             | 1                 | yes                                                     |
| Non-Response rate( <b>Exposure</b> )                                                               | 0                 | not described                                           |

**Ansaldi et al.2003**

|              |                                                                                                                                                                                                                 |
|--------------|-----------------------------------------------------------------------------------------------------------------------------------------------------------------------------------------------------------------|
| Study type   | Cross-sectional study                                                                                                                                                                                           |
| Participants | <p>Patients: children</p> <p>N: 256 cases, 87 controls</p> <p>Gender: 77 males/ 179 females case, 36 males/ 51 females control</p> <p>Location: Italy</p>                                                       |
| Comparison   | <p>Comparison: GFD in Patients with CD vs. control</p> <p>Case: GFD in Patients with CD</p> <p>Control: Non- GFD in Patients with CD</p>                                                                        |
| Outcomes     | <p>Main study outcome: the risk of prevalence of autoimmune thyroid disease and thyroid dysfunction</p> <p>Available outcomes: the risk of prevalence of autoimmune thyroid disease and thyroid dysfunction</p> |

***Risk of bias***

| Bias                                                                                               | Authors' judgment | Support for judgment                                    |
|----------------------------------------------------------------------------------------------------|-------------------|---------------------------------------------------------|
| Is the case definition adequate( <b>Selection</b> )                                                | 1                 | yes, with independent validation                        |
| Representativeness of the cases( <b>Selection</b> )                                                | 1                 | consecutive or obviously representative series of cases |
| Selection of Controls( <b>Selection</b> )                                                          | 0                 | hospital controls                                       |
| Definition of Controls( <b>Selection</b> )                                                         | 1                 | no history of disease (endpoint)                        |
| Comparability of cases and controls on the basis of the design or analysis( <b>Comparability</b> ) | 2                 | study controls age and gender between case and control  |
| Ascertainment of exposure( <b>Exposure</b> )                                                       | 1                 | secure record                                           |
| Same method of ascertainment for cases and controls( <b>Exposure</b> )                             | 1                 | yes                                                     |
| Non-Response rate( <b>Exposure</b> )                                                               | 0                 | not described                                           |

**Naiyer et al.2008**

|              |                                                                                                                           |
|--------------|---------------------------------------------------------------------------------------------------------------------------|
| Study type   | Cross-sectional study                                                                                                     |
| Participants | Patients: children<br>N: 46 cases, 40 controls<br>Location: Italy                                                         |
| Comparison   | Comparison: GFD in Patients with CD vs. control<br>Case: GFD in Patients with CD<br>Control: Non- GFD in Patients with CD |
| Outcomes     | Main study outcome: the risk of ATPO and ATG positivity<br>Available outcomes: the risk of ATPO and ATG positivity        |

***Risk of bias***

| <b>Bias</b>                                                                                        | <b>Authors' judgment</b> | <b>Support for judgment</b>                             |
|----------------------------------------------------------------------------------------------------|--------------------------|---------------------------------------------------------|
| Is the case definition adequate( <b>Selection</b> )                                                | 1                        | yes, with independent validation                        |
| Representativeness of the cases( <b>Selection</b> )                                                | 1                        | consecutive or obviously representative series of cases |
| Selection of Controls( <b>Selection</b> )                                                          | 0                        | not described                                           |
| Definition of Controls( <b>Selection</b> )                                                         | 1                        | no history of disease (endpoint)                        |
| Comparability of cases and controls on the basis of the design or analysis( <b>Comparability</b> ) | 1                        | study only controls age between case and control        |
| Ascertainment of exposure( <b>Exposure</b> )                                                       | 1                        | secure record                                           |
| Same method of ascertainment for cases and controls( <b>Exposure</b> )                             | 1                        | yes                                                     |
| Non-Response rate( <b>Exposure</b> )                                                               | 0                        | not described                                           |

**Toumi et al.2008**

|              |                                                                                                                           |
|--------------|---------------------------------------------------------------------------------------------------------------------------|
| Study type   | Cross-sectional study                                                                                                     |
| Participants | Patients: adult<br>N: 21 cases, 56 controls<br>Location: Tunisia                                                          |
| Comparison   | Comparison: GFD in Patients with CD vs. control<br>Case: GFD in Patients with CD<br>Control: Non- GFD in Patients with CD |
| Outcomes     | Main study outcome: the risk of thyroid dysfunction<br>Available outcomes: the risk of thyroid dysfunction                |

***Risk of bias***

| <b>Bias</b>                                                                                        | <b>Authors' judgment</b> | <b>Support for judgment</b>                             |
|----------------------------------------------------------------------------------------------------|--------------------------|---------------------------------------------------------|
| Is the case definition adequate( <b>Selection</b> )                                                | 1                        | yes, with independent validation                        |
| Representativeness of the cases( <b>Selection</b> )                                                | 1                        | consecutive or obviously representative series of cases |
| Selection of Controls( <b>Selection</b> )                                                          | 0                        | hospital controls                                       |
| Definition of Controls( <b>Selection</b> )                                                         | 1                        | no history of disease (endpoint)                        |
| Comparability of cases and controls on the basis of the design or analysis( <b>Comparability</b> ) | 1                        | study only controls age between case and control        |
| Ascertainment of exposure( <b>Exposure</b> )                                                       | 1                        | secure record                                           |
| Same method of ascertainment for cases and controls( <b>Exposure</b> )                             | 1                        | yes                                                     |
| Non-Response rate( <b>Exposure</b> )                                                               | 0                        | not described                                           |

**Meloni et al.2008**

|              |                                                                                                                                                                                                              |
|--------------|--------------------------------------------------------------------------------------------------------------------------------------------------------------------------------------------------------------|
| Study type   | Cross-sectional study                                                                                                                                                                                        |
| Participants | Patients: children<br>N: 324 cases, 313 controls<br>Location: Italy                                                                                                                                          |
| Comparison   | Comparison: GFD in Patients with CD vs. control<br>Case: GFD in Patients with CD<br>Control: Non- GFD in Patients with CD                                                                                    |
| Outcomes     | Main study outcome: the risk of ATPO and ATG positivity and prevalence of autoimmune thyroid disease<br>Available outcomes: the risk of ATPO and ATG positivity and prevalence of autoimmune thyroid disease |

***Risk of bias***

| Bias                                                                                               | Authors' judgment | Support for judgment                                    |
|----------------------------------------------------------------------------------------------------|-------------------|---------------------------------------------------------|
| Is the case definition adequate( <b>Selection</b> )                                                | 1                 | yes, with independent validation                        |
| Representativeness of the cases( <b>Selection</b> )                                                | 1                 | consecutive or obviously representative series of cases |
| Selection of Controls( <b>Selection</b> )                                                          | 0                 | hospital controls                                       |
| Definition of Controls( <b>Selection</b> )                                                         | 1                 | no history of disease (endpoint)                        |
| Comparability of cases and controls on the basis of the design or analysis( <b>Comparability</b> ) | 1                 | study only controls age between case and control        |
| Ascertainment of exposure( <b>Exposure</b> )                                                       | 1                 | secure record                                           |
| Same method of ascertainment for cases and controls( <b>Exposure</b> )                             | 1                 | yes                                                     |
| Non-Response rate( <b>Exposure</b> )                                                               | 0                 | not described                                           |

**Norström et al. 2012**

|              |                                                                                                                                                      |
|--------------|------------------------------------------------------------------------------------------------------------------------------------------------------|
| Study type   | Cross-sectional study                                                                                                                                |
| Participants | Patients: adult<br>N: 973 cases, 1031 controls<br>Location: Sweden                                                                                   |
| Comparison   | Comparison: GFD in Patients with CD vs. control<br>Case: GFD in Patients with CD<br>Control: Non- GFD in Patients with CD                            |
| Outcomes     | Main study outcome: the risk of prevalence of autoimmune thyroid disease<br>Available outcomes: the risk of prevalence of autoimmune thyroid disease |

***Risk of bias***

| <b>Bias</b>                                                                                        | <b>Authors' judgment</b> | <b>Support for judgment</b>                             |
|----------------------------------------------------------------------------------------------------|--------------------------|---------------------------------------------------------|
| Is the case definition adequate( <b>Selection</b> )                                                | 1                        | yes, with independent validation                        |
| Representativeness of the cases( <b>Selection</b> )                                                | 1                        | consecutive or obviously representative series of cases |
| Selection of Controls( <b>Selection</b> )                                                          | 0                        | not described                                           |
| Definition of Controls( <b>Selection</b> )                                                         | 1                        | no history of disease (endpoint)                        |
| Comparability of cases and controls on the basis of the design or analysis( <b>Comparability</b> ) | 2                        | study controls age and gender between case and control  |
| Ascertainment of exposure( <b>Exposure</b> )                                                       | 1                        | secure record                                           |
| Same method of ascertainment for cases and controls( <b>Exposure</b> )                             | 1                        | yes                                                     |
| Non-Response rate( <b>Exposure</b> )                                                               | 0                        | not described                                           |

**Pals et.al.2014**

|              |                                                                                                                           |
|--------------|---------------------------------------------------------------------------------------------------------------------------|
| Study type   | Cross-sectional study                                                                                                     |
| Participants | Patients: children<br>N: 93 cases, 242 controls<br>Location: Sweden                                                       |
| Comparison   | Comparison: GFD in Patients with CD vs. control<br>Case: GFD in Patients with CD<br>Control: Non- GFD in Patients with CD |
| Outcomes     | Main study outcome: the risk of ATPO positivity<br>Available outcomes: the risk of ATPO positivity                        |

***Risk of bias***

| <b>Bias</b>                                                                                        | <b>Authors' judgment</b> | <b>Support for judgment</b>                             |
|----------------------------------------------------------------------------------------------------|--------------------------|---------------------------------------------------------|
| Is the case definition adequate( <b>Selection</b> )                                                | 1                        | yes, with independent validation                        |
| Representativeness of the cases( <b>Selection</b> )                                                | 1                        | consecutive or obviously representative series of cases |
| Selection of Controls( <b>Selection</b> )                                                          | 1                        | community controls                                      |
| Definition of Controls( <b>Selection</b> )                                                         | 1                        | no history of disease (endpoint)                        |
| Comparability of cases and controls on the basis of the design or analysis( <b>Comparability</b> ) | 1                        | study only controls sex between case and control        |
| Ascertainment of exposure( <b>Exposure</b> )                                                       | 1                        | secure record                                           |
| Same method of ascertainment for cases and controls( <b>Exposure</b> )                             | 1                        | yes                                                     |
| Non-Response rate( <b>Exposure</b> )                                                               | 0                        | not described                                           |



**Imperatore et.al.2016**

|              |                                                                                                                                                      |
|--------------|------------------------------------------------------------------------------------------------------------------------------------------------------|
| Study type   | Cross-sectional study                                                                                                                                |
| Participants | Patients: adult<br>N: 1148 cases, 1255 controls<br>Location: Italy                                                                                   |
| Comparison   | Comparison: GFD in Patients with CD vs. control<br>Case: GFD in Patients with CD<br>Control: Non- GFD in Patients with CD                            |
| Outcomes     | Main study outcome: the risk of prevalence of autoimmune thyroid disease<br>Available outcomes: the risk of prevalence of autoimmune thyroid disease |

***Risk of bias***

| Bias                                                                                               | Authors' judgment | Support for judgment                                    |
|----------------------------------------------------------------------------------------------------|-------------------|---------------------------------------------------------|
| Is the case definition adequate( <b>Selection</b> )                                                | 1                 | yes, with independent validation                        |
| Representativeness of the cases( <b>Selection</b> )                                                | 1                 | consecutive or obviously representative series of cases |
| Selection of Controls( <b>Selection</b> )                                                          | 0                 | hospital controls                                       |
| Definition of Controls( <b>Selection</b> )                                                         | 1                 | no history of disease (endpoint)                        |
| Comparability of cases and controls on the basis of the design or analysis( <b>Comparability</b> ) | 0                 | not described                                           |
| Ascertainment of exposure( <b>Exposure</b> )                                                       | 1                 | secure record                                           |
| Same method of ascertainment for cases and controls( <b>Exposure</b> )                             | 1                 | yes                                                     |
| Non-Response rate( <b>Exposure</b> )                                                               | 0                 | not described                                           |

**Norström et.al.2018**

|              |                                                                                                                                                    |
|--------------|----------------------------------------------------------------------------------------------------------------------------------------------------|
| Study type   | Cross-sectional study                                                                                                                              |
| Participants | Patients: children<br>N: 89 cases, 220 controls<br>Location: Sweden                                                                                |
| Comparison   | Comparison: GFD in Patients with CD vs. control<br>Case: GFD in Patients with CD<br>Control: Non- GFD in Patients with CD                          |
| Outcomes     | Main study outcome: the risk of ATPO positivity and thyroid dysfunction<br>Available outcomes: the risk of ATPO positivity and thyroid dysfunction |

***Risk of bias***

| <b>Bias</b>                                                                                        | <b>Authors' judgment</b> | <b>Support for judgment</b>                             |
|----------------------------------------------------------------------------------------------------|--------------------------|---------------------------------------------------------|
| Is the case definition adequate( <b>Selection</b> )                                                | 1                        | yes, with independent validation                        |
| Representativeness of the cases( <b>Selection</b> )                                                | 1                        | consecutive or obviously representative series of cases |
| Selection of Controls( <b>Selection</b> )                                                          | 1                        | community controls                                      |
| Definition of Controls( <b>Selection</b> )                                                         | 1                        | no history of disease (endpoint)                        |
| Comparability of cases and controls on the basis of the design or analysis( <b>Comparability</b> ) | 1                        | study only controls sex between case and control        |
| Ascertainment of exposure( <b>Exposure</b> )                                                       | 1                        | secure record                                           |
| Same method of ascertainment for cases and controls( <b>Exposure</b> )                             | 1                        | yes                                                     |
| Non-Response rate( <b>Exposure</b> )                                                               | 0                        | not described                                           |

**Table S2. The Summary of Findings (SoF) with GRADE system.**

**GFD on Patients diagnosed with CD and normal diet on Patients diagnosed with CD in risk of thyroid autoimmunity**

**Population:** GFD in Patients with CD vs. Normal Diet in Control

**Settings:** Five of the studies were conducted in southern Europe, three studies in northern Europe, one study in North America and one study in North Africa

**Cases:** Gluten-free diet in Patients diagnosed with CD

**Controls:** Normal diet or regular diet in Patients diagnosed with CD

| Outcomes                         | OR (95% CI)                   | No. of participants(studies)   | Quality of the evidence<br>Comments (GRADE) |
|----------------------------------|-------------------------------|--------------------------------|---------------------------------------------|
| The risk of thyroid autoimmunity | 0.87(0.47, 1.63) <sup>1</sup> | 6423(10 observational studies) | ⊕ ⊕ ⊕ ⊖ Moderate <sup>2</sup>               |

Abbreviations: OR: odd ratio; CI: Confidence interval;

**GRADE Working Group grades of evidence**

**High quality:** We are very confident that the true effect lies close to that of the estimate of the effect

**Moderate quality:** We are moderately confident in the effect estimate: The true effect is likely to be close to the estimate of the effect, but there is a possibility that it is substantially different

**Low quality:** Our confidence in the effect estimate is limited: The true effect may be substantially different from the estimate of the effect

**Very low quality:** We have very little confidence in the effect estimate: The true effect is likely to be substantially different from the estimate of effect

<sup>1</sup>Results for the risk of thyroid autoimmune of primary outcomes

<sup>2</sup>Upgraded by one level due to all the results of the included studies were almost identical

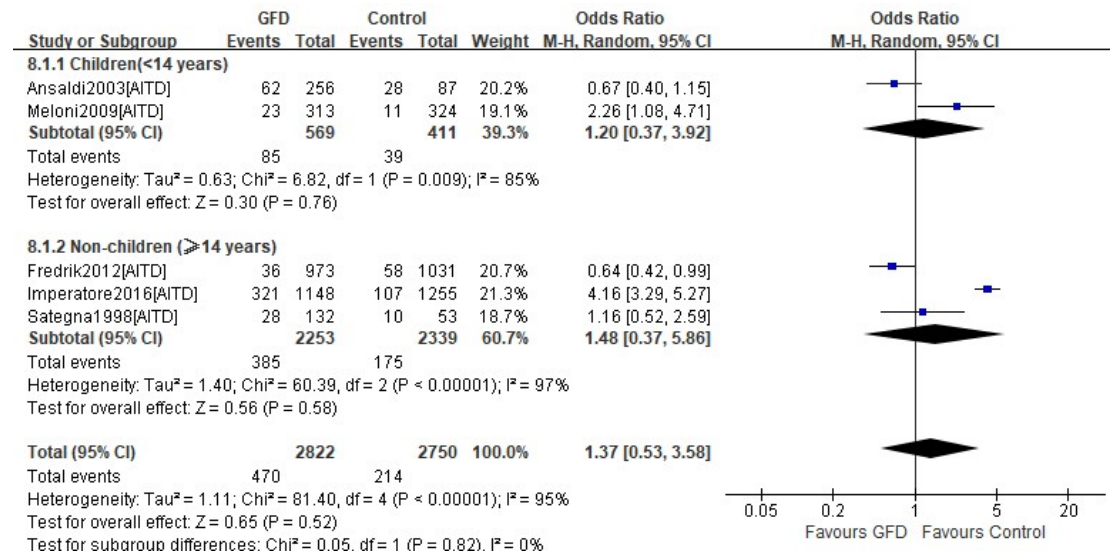

Figure S1 Subgroup analysis of children (<14 years) vs. non-children ( $\geq 14$  years) for the risk of developing AITD in CD patients who adhered GFD vs. Controls.

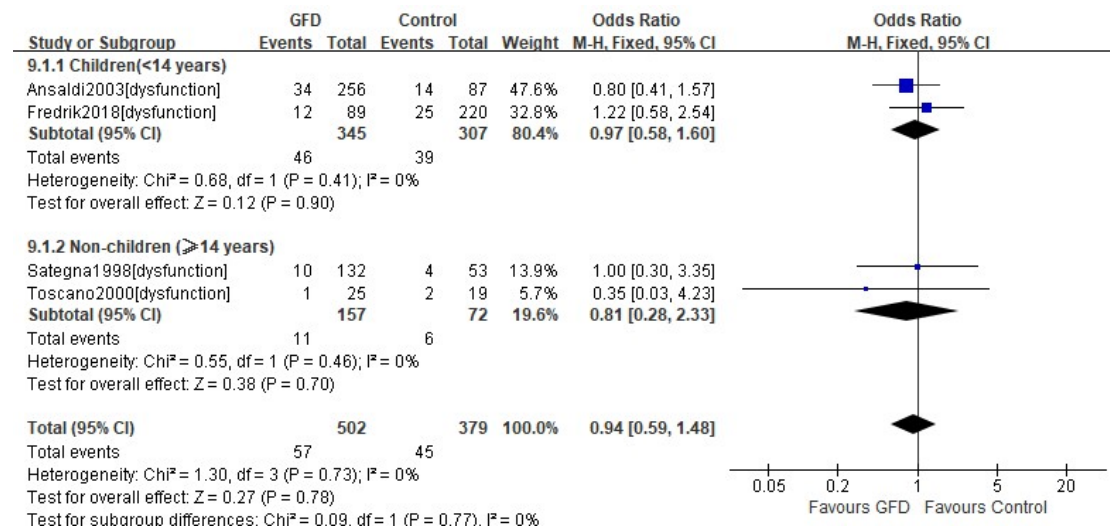

Figure S2 Subgroup analysis of children (<14 years) vs. non-children (≥14 years) for the risk of developing immune-related thyroid dysfunction in CD patients who adhered GFD vs. Controls.

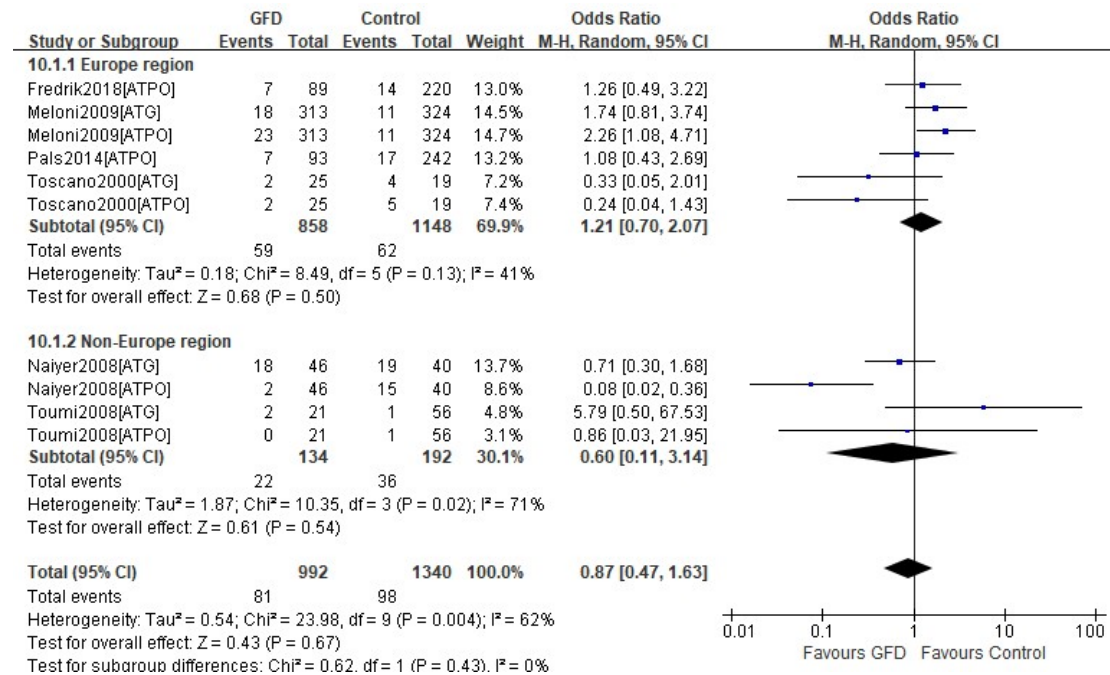

Figure S3 Subgroup analysis of Europe region vs. non-Europe region for the risk of ATPO and ATG antibody positivity in CD patients who underwent GFD vs. Controls.

(a)

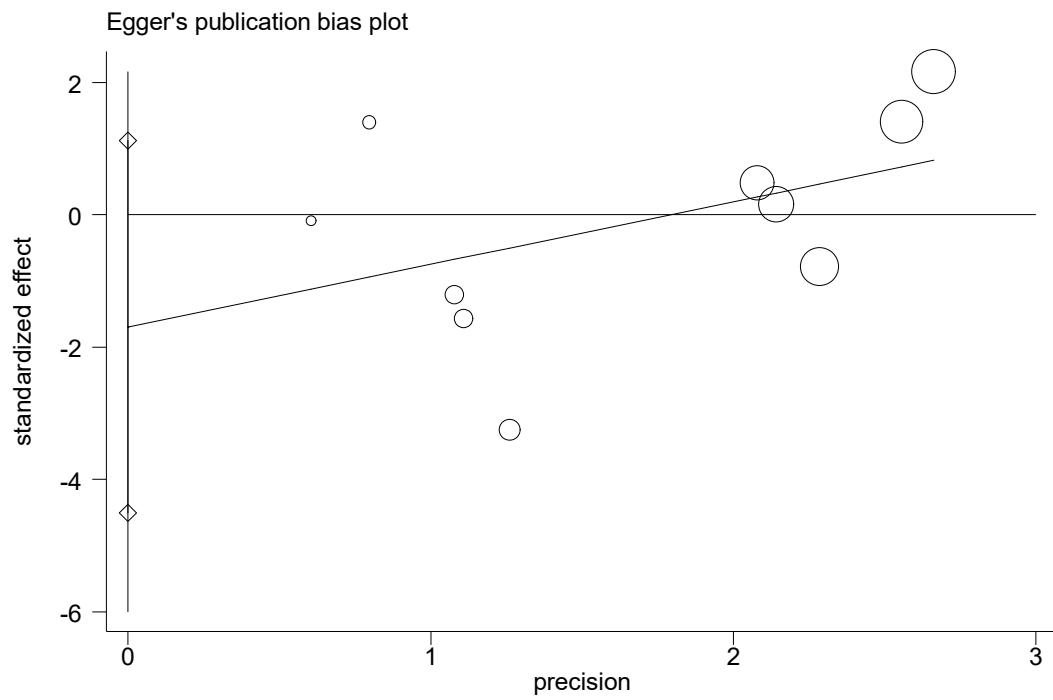

(b)

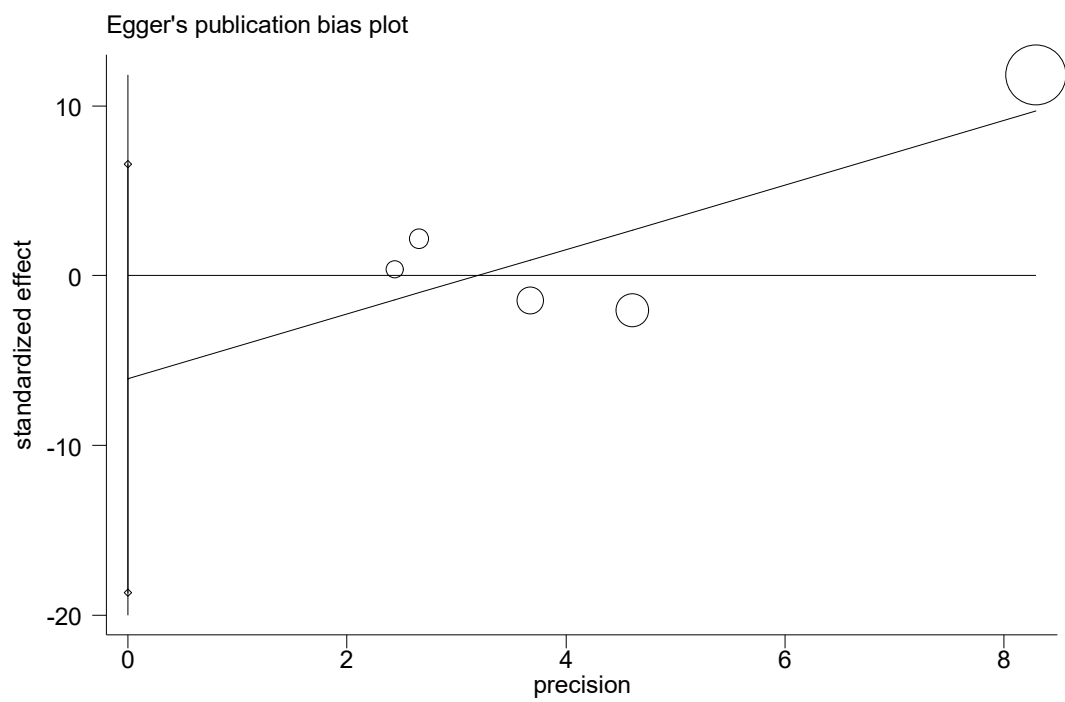

(c)

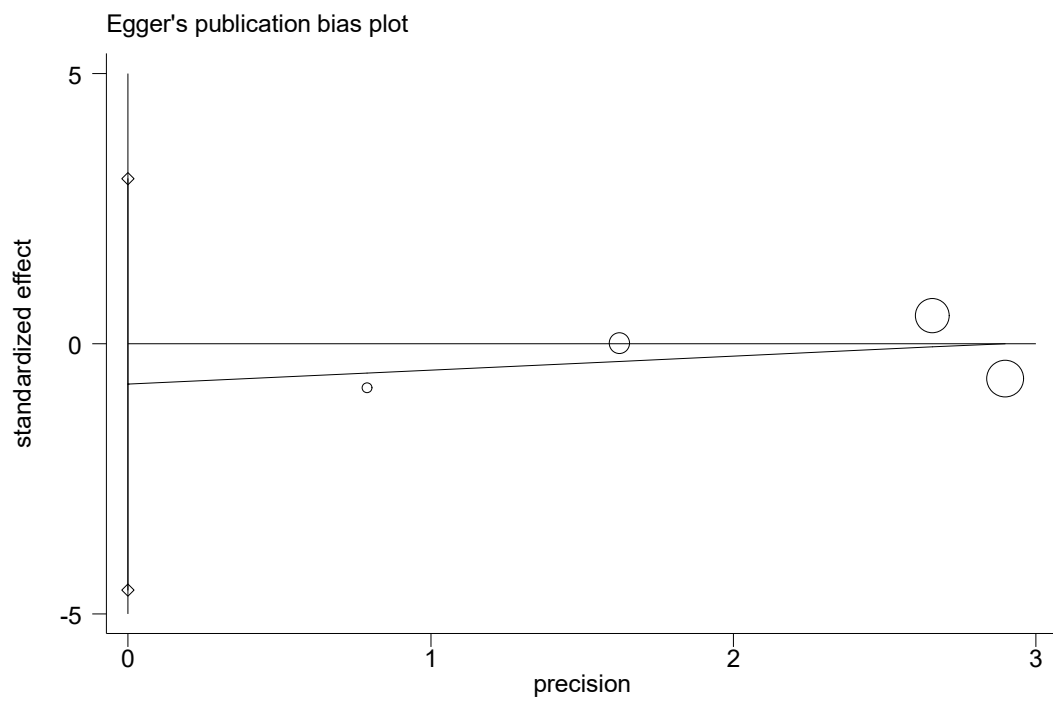

Figure S4 Funnel plot of publication bias for involved studies. (a) Publication bias in the risk of ATPO and ATG antibody positivity; (b) Publication bias in the risk of developing AITD; (c) Publication bias in the risk of developing thyroid dysfunction.
